# Supplementary material for: Expression levels of uridine 5'-diphospho-glucuronosyltransferase genes in breast tissue from healthy women are associated with mammographic density
Source: PubMed Central journal article supplement (PMC2949660; doi:10.1186/bcr2632), 2010-08-27
Supplement: bcr2632-S2.pdf [file bcr2632-S2.pdf]

## Additional figures and tables

**Figure S1: The percentage of samples with low expression of *UGT* genes ( $<-0.5$ ) within tumour samples and healthy women with high ( $\geq 30\%$ ) or low ( $<30\%$ ) MD.**

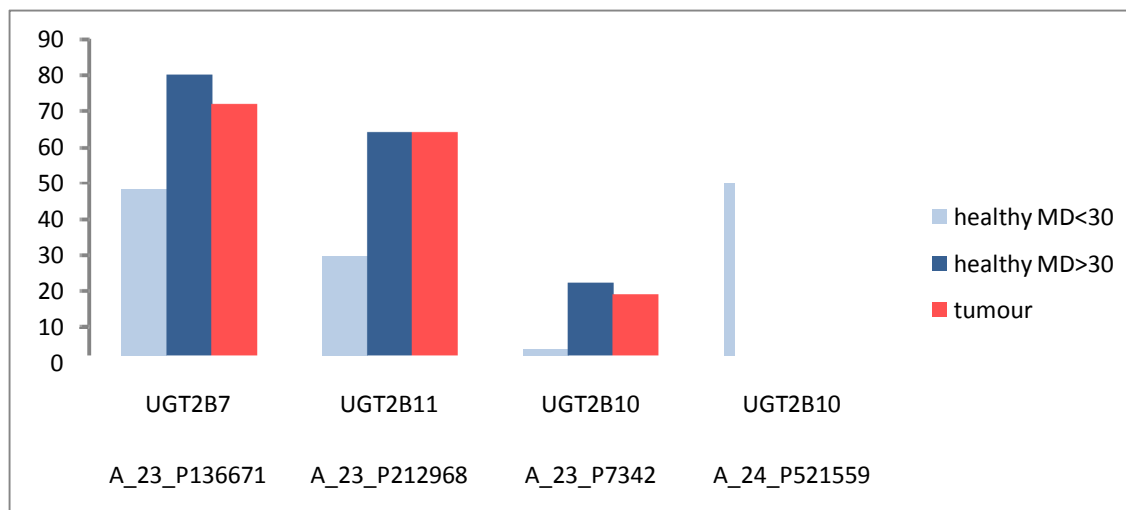

**Figure S2:** Clustering of the genes significantly down regulated in high MD samples. The three UGT genes cluster separately and tightly together. Samples are sorted according to MD.

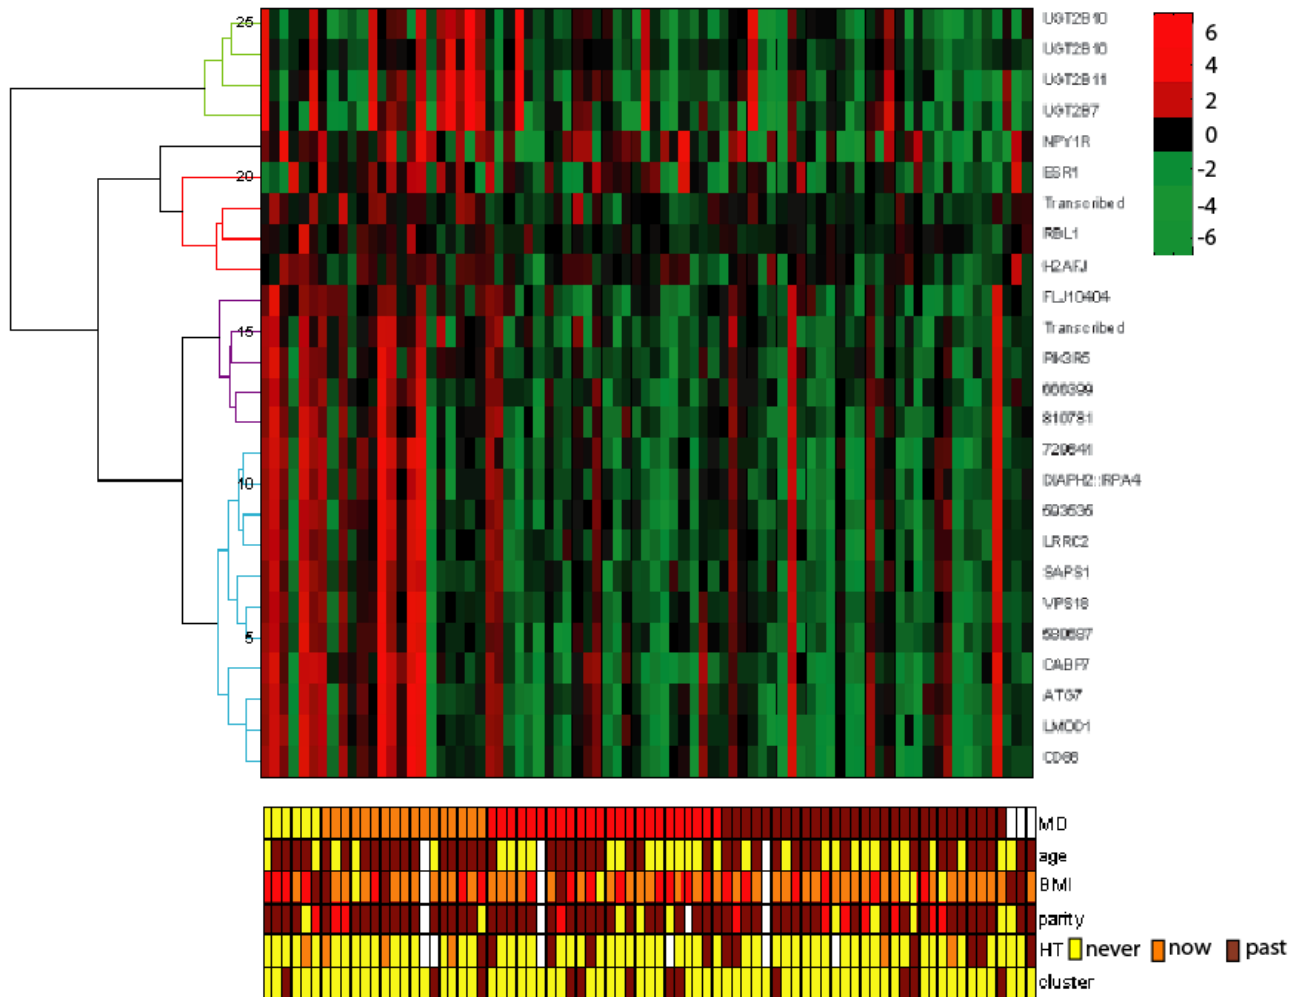

**Figure S3: The expression of the different *UGT* genes is highly correlated.** Expression of the four probes representing *UGT*-transcripts (y-axis) for each sample (x-axis) for A) healthy women and B) breast cancer patients respectively

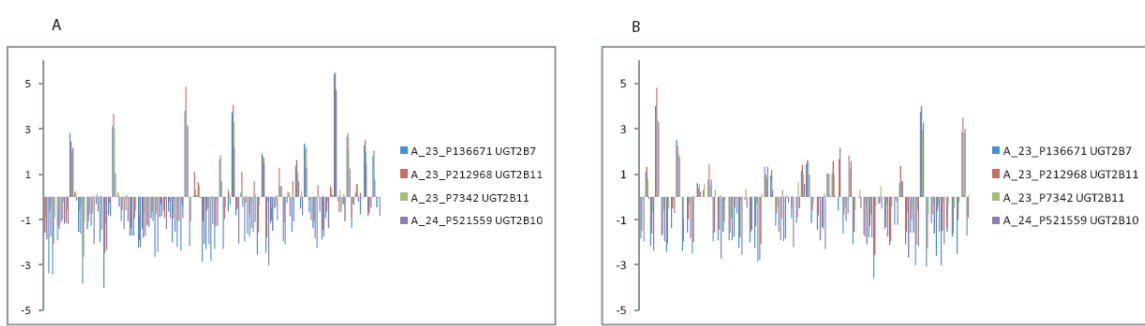

**Table S1: Correlation between the expression of different *UGT* genes**

|                      | A_23_P136671<br>UGT2B7 | A_23_P212968<br>UGT2B11 | A_23_P7342<br>UGT2B10 | A_24_P521559<br>UGT2B10 |
|----------------------|------------------------|-------------------------|-----------------------|-------------------------|
| A_23_P136671 UGT2B7  | -                      | 0.92                    | 0.91                  | 0.90                    |
| A_23_P212968 UGT2B11 | 0.92                   | -                       | 0.93                  | 0.94                    |
| A_23_P7342 UGT2B10   | 0.91                   | 0.93                    | -                     | 0.90                    |
| A_24_P521559 UGT2B10 | 0.90                   | 0.94                    | 0.90                  | -                       |

**Table S2:** MD and expression of UGT genes in samples from healthy women

|                               |                 | MD          | A_23_P136671<br>UGT2B7<br>expression | A_23_P7342<br>UGT2B10<br>expression | A_24_P521559<br>UGT2B10<br>expression | A_23_P212968<br>UGT2B11<br>expression |
|-------------------------------|-----------------|-------------|--------------------------------------|-------------------------------------|---------------------------------------|---------------------------------------|
| age                           | mean <50 (n=31) | 40.4        | -0.83                                | 0.15                                | -0.74                                 | -0.07                                 |
|                               | mean ≥50 (n=45) | 35.2        | -0.68                                | 0.22                                | -0.70                                 | -0.07                                 |
|                               | p-value         | 0.25        | 0.72                                 | 0.78                                | 0.92                                  | 0.99                                  |
| BMI                           | mean <25 (n=49) | 41.2        | -0.84                                | 0.12                                | -0.77                                 | -0.11                                 |
|                               | mean ≥25 (n=27) | 30.0        | -0.57                                | 0.31                                | -0.63                                 | 0.02                                  |
|                               | p-value         | <b>0.01</b> | 0.53                                 | 0.45                                | 0.66                                  | 0.73                                  |
| Age at first<br>birth         | mean <25 (n=38) | 31.5        | -0.66                                | 0.25                                | -0.60                                 | -0.03                                 |
|                               | mean ≥25 (n=18) | 39.0        | -0.64                                | 0.22                                | -0.48                                 | 0.00                                  |
|                               | p-value         | 0.14        | 0.96                                 | 0.93                                | 0.77                                  | 0.95                                  |
| Current<br>hormone<br>therapy | mean yes (n=64) | 46.5        | -0.97                                | -0.12                               | -1.04                                 | -0.50                                 |
|                               | mean no (n=12)  | 35.6        | -0.71                                | 0.24                                | -0.64                                 | 0.01                                  |
|                               | p-value         | 0.07        | 0.65                                 | 0.25                                | 0.35                                  | 0.30                                  |

MD and expression of UGT genes in samples from healthy women in relation to epidemiological factors. All p-values are from two-sided t-tests not corrected for multiple testing.

**Figure S3: Unsupervised hierarchical clustering showed two main clusters.** MD was not significantly different between these two clusters.

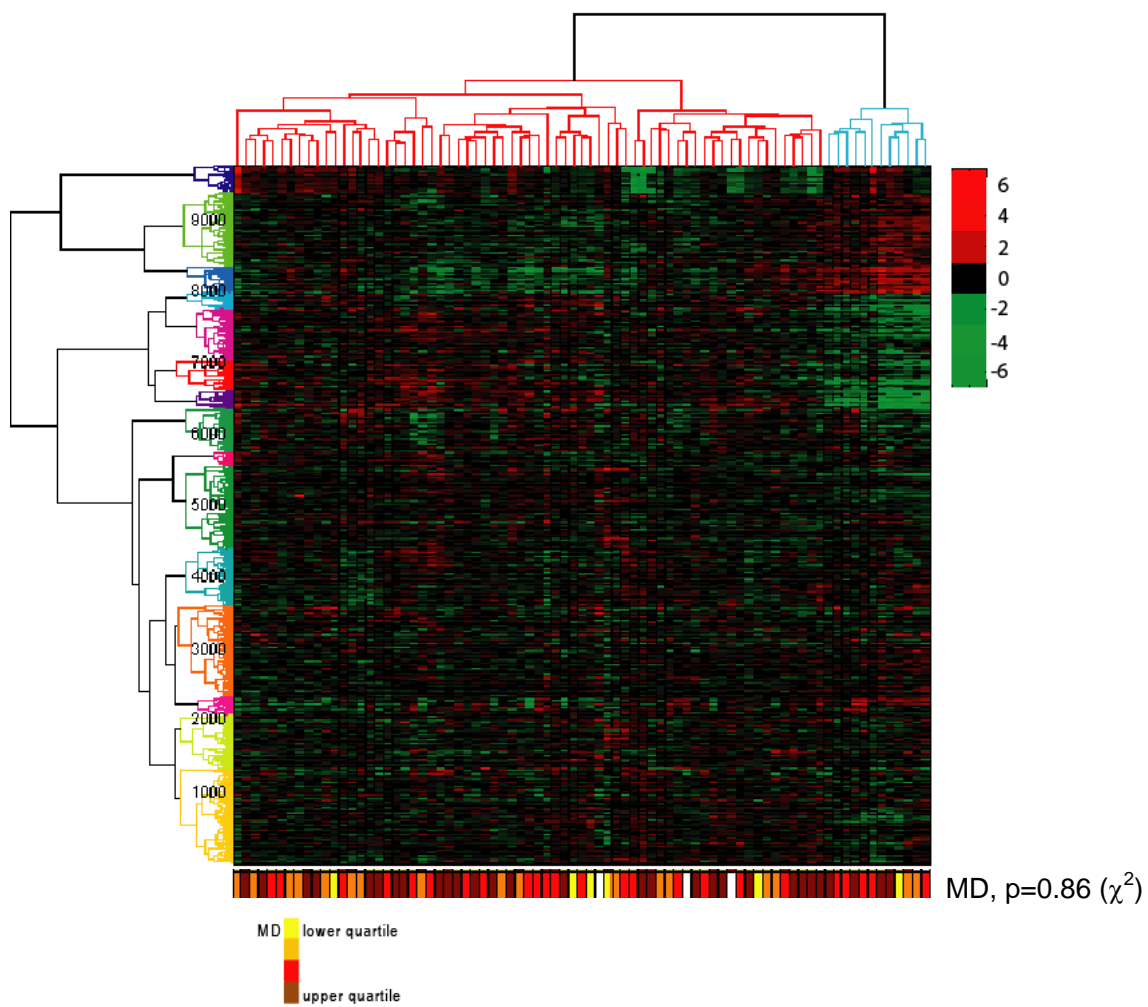

**Figure S4: MD in relation to tumour subgroups**

a) Boxplot of MD vs subtypes

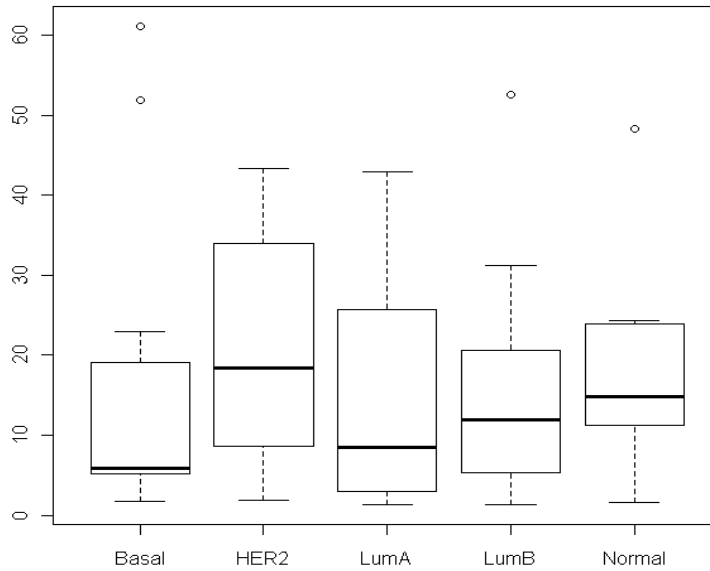

a) Boxplot of MD for each pam50 risk group (1=high, 3=medium, 5=low risk).

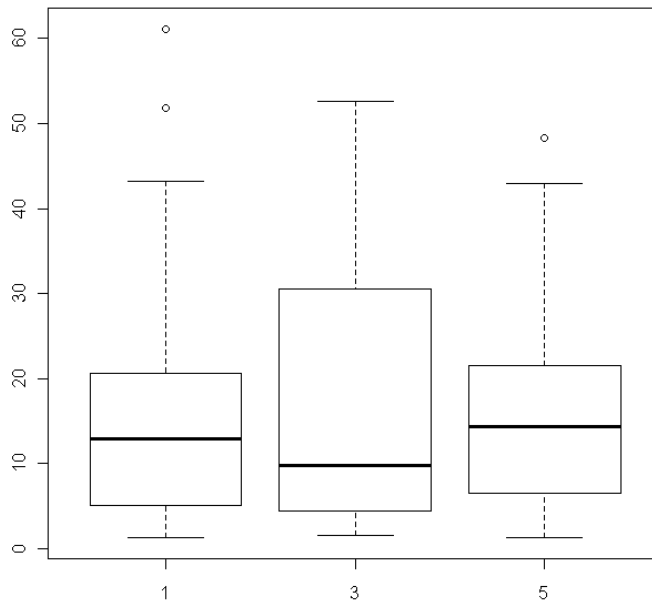

**Figure S5: Distribution of MD in a) all samples (mean=), b) healthy women (mean=37%) and c) breast cancer patients (mean=16%)**

a) MD frequency all women

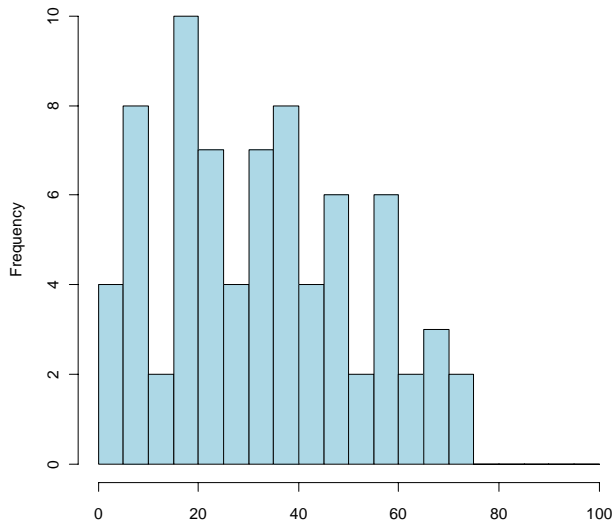

b) MD frequency healthy women

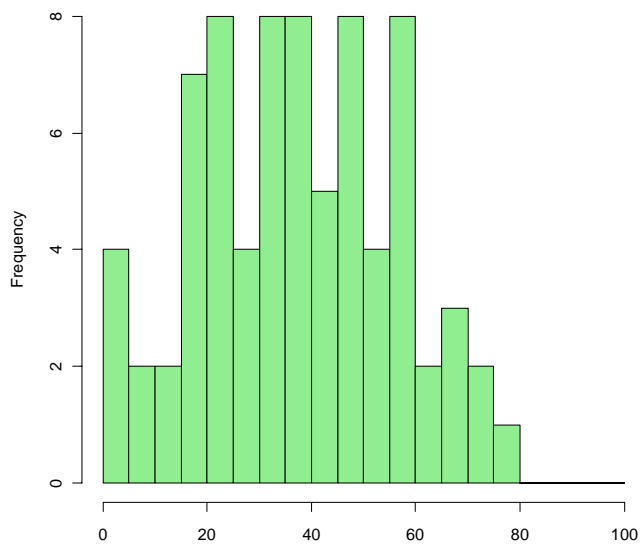

c) MD frequency breast cancer patients

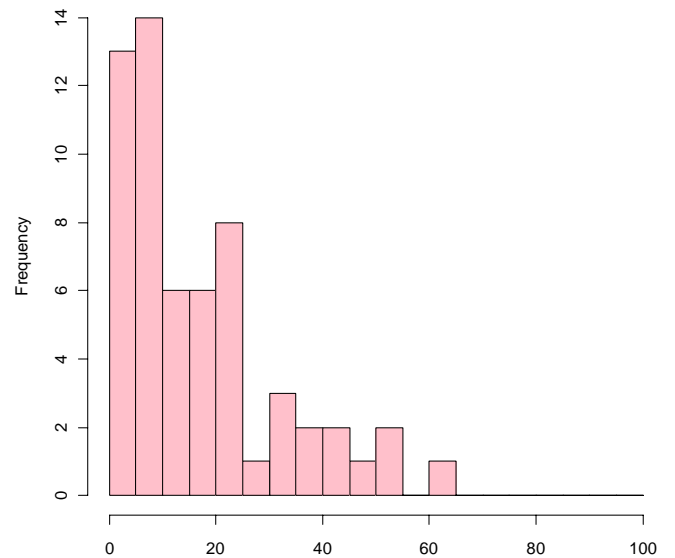

**Figure S6: Localisation of UGT genes on chromosome 4:**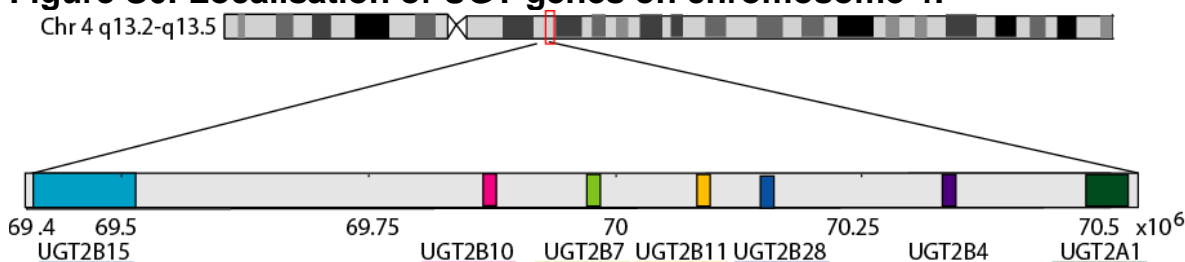**Table S4: Gene expression in samples from healthy women with differing MD compared with tumour samples.**

A) MD < 30% vs MD > 30%: The mean expression of all four probes representing *UGT* genes is not significantly different between tumour samples and normal samples from breasts with high MD. For three *UGT* probes, mean expression is significantly different between tumour samples and normal samples from breasts with low MD. This is not the case for most other genes.

| Agilent ID          | SYMBOL         | mean<br>t    | mean n      |              | ttest t vs<br>MD<30% | ttest t vs<br>n<br>MD>30% |
|---------------------|----------------|--------------|-------------|--------------|----------------------|---------------------------|
|                     |                |              | MD<br><30%  | MD>30%       |                      |                           |
| A_23_P119448        | SAPS1          | 0.87         | 0.98        | 0.13         | 0.693                | 0.000                     |
| <b>A_23_P136671</b> | <b>UGT2B7</b>  | <b>-1.00</b> | <b>0.21</b> | <b>-1.24</b> | <b>0.005</b>         | <b>0.402</b>              |
| A_23_P144244        | 810781         | 1.16         | 1.12        | 0.28         | 0.889                | 0.000                     |
| A_23_P152570        | 580687         | 1.53         | 1.78        | 0.87         | 0.430                | 0.003                     |
| A_23_P155463        | LRRC2          | 1.39         | 1.60        | 0.65         | 0.478                | 0.001                     |
| A_23_P204277        | H2AFJ          | 1.62         | 1.20        | 0.79         | 0.047                | 0.000                     |
| <b>A_23_P212968</b> | <b>UGT2B11</b> | <b>-0.43</b> | <b>0.77</b> | <b>-0.50</b> | <b>0.003</b>         | <b>0.768</b>              |
| A_23_P254212        | DIAPH2::RPA4   | 1.50         | 1.62        | 0.68         | 0.705                | 0.000                     |
| A_23_P28733         | RBL1           | -0.90        | -0.77       | -1.12        | 0.306                | 0.010                     |
| A_23_P309739        | ESR1           | 2.32         | 1.96        | 1.32         | 0.282                | 0.000                     |
| A_23_P427472        | FLJ10404       | 1.21         | 1.44        | 0.51         | 0.466                | 0.002                     |
| A_23_P66543         | PIK3R5         | 0.89         | 0.95        | 0.07         | 0.833                | 0.000                     |
| A_23_P69699         | NPY1R          | 1.42         | 2.01        | 1.35         | 0.267                | 0.902                     |
| <b>A_23_P7342</b>   | <b>UGT2B10</b> | <b>0.16</b>  | <b>0.79</b> | <b>-0.13</b> | <b>0.010</b>         | <b>0.054</b>              |
| A_24_P131589        | CD86           | 1.57         | 1.93        | 0.79         | 0.305                | 0.002                     |
| A_24_P177236        | CABP7          | 1.63         | 1.95        | 0.68         | 0.378                | 0.000                     |
| A_24_P18802         | VPS18          | 1.44         | 1.64        | 0.69         | 0.510                | 0.000                     |
| <b>A_24_P521559</b> | <b>UGT2B10</b> | <b>-0.70</b> | <b>0.07</b> | <b>-1.08</b> | <b>0.072</b>         | <b>0.148</b>              |
| A_24_P640617        | Transcribed    | 0.97         | 1.04        | 0.18         | 0.801                | 0.000                     |
| A_24_P932736        | 729641         | 1.55         | 1.68        | 0.59         | 0.714                | 0.000                     |
| A_32_P107994        | ATG7           | 1.51         | 1.78        | 0.74         | 0.413                | 0.001                     |
| A_32_P199824        | LMOD1          | 1.55         | 1.91        | 0.77         | 0.320                | 0.002                     |
| A_32_P20997         | Transcribed    | 0.25         | 0.56        | 0.10         | 0.008                | 0.092                     |
| A_32_P35668         | 666399         | 1.31         | 1.51        | 0.62         | 0.499                | 0.001                     |
| A_32_P80016         | 593535         | 1.59         | 1.72        | 0.75         | 0.676                | 0.000                     |



**Table S4 cont B) MD<20% vs MD>40%:** The mean expression of all four probes representing UGT genes is not significantly different between tumour samples and normal samples from breasts with high MD, as opposed to most other probes. There is no significant difference in mean expression between tumour samples and normal samples from breasts with low MD. Contrary to most other probes, the mean expression of the UGT genes in tumours is more similar to the mean expression in normal samples from breasts with high than low MD.

| Agilent ID          | SYMBOL         | mean t       | MD <20% vs >40% |              |                  |                  |              |             |             |             |
|---------------------|----------------|--------------|-----------------|--------------|------------------|------------------|--------------|-------------|-------------|-------------|
|                     |                |              | mean MD <20%    | mean MD >40% | ttest vs MD <20% | ttest vs MD >40% | t-n low MD   | t-n low MD  | t-n high MD | t closer to |
| A_23_P119448        | SAPS1          | 0.87         | 1.31            | 0.18         | 0.23             | 0.01             | -0.44        | 0.44        | 0.69        | low         |
| <b>A_23_P136671</b> | <b>UGT2B7</b>  | <b>-1.00</b> | <b>-0.39</b>    | <b>-1.22</b> | <b>0.22</b>      | <b>0.52</b>      | <b>-0.61</b> | <b>0.61</b> | <b>0.21</b> | <b>high</b> |
| A_23_P144244        | 810781         | 1.16         | 1.46            | 0.37         | 0.42             | 0.00             | -0.31        | 0.31        | 0.79        | low         |
| A_23_P152570        | 580687         | 1.53         | 2.12            | 0.98         | 0.13             | 0.04             | -0.59        | 0.59        | 0.55        | high        |
| A_23_P155463        | LRRC2          | 1.39         | 1.78            | 0.72         | 0.29             | 0.01             | -0.39        | 0.39        | 0.67        | low         |
| A_23_P204277        | H2AFJ          | 1.62         | 1.18            | 0.73         | 0.11             | 0.00             | 0.44         | 0.44        | 0.89        | low         |
| <b>A_23_P212968</b> | <b>UGT2B11</b> | <b>-0.43</b> | <b>0.24</b>     | <b>-0.52</b> | <b>0.15</b>      | <b>0.75</b>      | <b>-0.66</b> | <b>0.66</b> | <b>0.09</b> | <b>high</b> |
| A_23_P254212        | DIAPH2::RPA4   | 1.50         | 1.98            | 0.75         | 0.23             | 0.01             | -0.48        | 0.48        | 0.76        | low         |
| A_23_P28733         | RBL1           | -0.90        | -0.70           | -1.15        | 0.18             | 0.01             | -0.20        | 0.20        | 0.26        | low         |
| A_23_P309739        | ESR1           | 2.32         | 1.89            | 1.21         | 0.32             | 0.00             | 0.43         | 0.43        | 1.12        | low         |
| A_23_P427472        | FLJ10404       | 1.21         | 1.70            | 0.53         | 0.24             | 0.01             | -0.49        | 0.49        | 0.68        | low         |
| A_23_P66543         | PIK3R5         | 0.89         | 1.14            | 0.17         | 0.51             | 0.01             | -0.25        | 0.25        | 0.72        | low         |
| A_23_P69699         | NPY1R          | 1.42         | 2.21            | 1.26         | 0.25             | 0.73             | -0.78        | 0.78        | 0.16        | high        |
| <b>A_23_P7342</b>   | <b>UGT2B10</b> | <b>0.16</b>  | <b>0.50</b>     | <b>-0.15</b> | <b>0.20</b>      | <b>0.07</b>      | <b>-0.34</b> | <b>0.34</b> | <b>0.30</b> | <b>high</b> |
| A_24_P131589        | CD86           | 1.57         | 2.26            | 0.87         | 0.10             | 0.02             | -0.68        | 0.68        | 0.70        | low         |
| A_24_P177236        | CABP7          | 1.63         | 2.25            | 0.77         | 0.17             | 0.01             | -0.62        | 0.62        | 0.86        | low         |
| A_24_P18802         | VPS18          | 1.44         | 1.88            | 0.77         | 0.23             | 0.01             | -0.44        | 0.44        | 0.67        | low         |
| <b>A_24_P521559</b> | <b>UGT2B10</b> | <b>-0.70</b> | <b>-0.38</b>    | <b>-1.14</b> | <b>0.52</b>      | <b>0.17</b>      | <b>-0.32</b> | <b>0.32</b> | <b>0.44</b> | <b>low</b>  |
| A_24_P640617        | Transcribed    | 0.97         | 1.25            | 0.32         | 0.42             | 0.01             | -0.28        | 0.28        | 0.65        | low         |
| A_24_P932736        | 729641         | 1.55         | 2.10            | 0.64         | 0.19             | 0.00             | -0.55        | 0.55        | 0.91        | low         |
| A_32_P107994        | ATG7           | 1.51         | 2.07            | 0.83         | 0.17             | 0.02             | -0.57        | 0.57        | 0.68        | low         |
| A_32_P199824        | LMOD1          | 1.55         | 2.22            | 0.84         | 0.12             | 0.02             | -0.67        | 0.67        | 0.71        | low         |
| A_32_P20997         | Transcribed    | 0.25         | 0.69            | 0.15         | 0.00             | 0.28             | -0.44        | 0.44        | 0.10        | high        |
| A_32_P35668         | 666399         | 1.31         | 1.71            | 0.71         | 0.28             | 0.02             | -0.41        | 0.41        | 0.60        | low         |
| A_32_P80016         | 593535         | 1.59         | 2.02            | 0.82         | 0.26             | 0.00             | -0.42        | 0.42        | 0.78        | low         |

**Figure S7: The Kullback-Leibler divergence** between UGT expression in tumours and healthy samples with high and low MD respectively. Small divergence means more similar distribution in the two populations tested. For three of four UGT probes, the distribution in tumour samples is more similar to the distribution in healthy individuals with high-MD than with low-MD. (The first UGT2B10-probe is A\_23\_P7342, the probe that is significant in the GLM-analysis, the second is A\_24\_P521559).

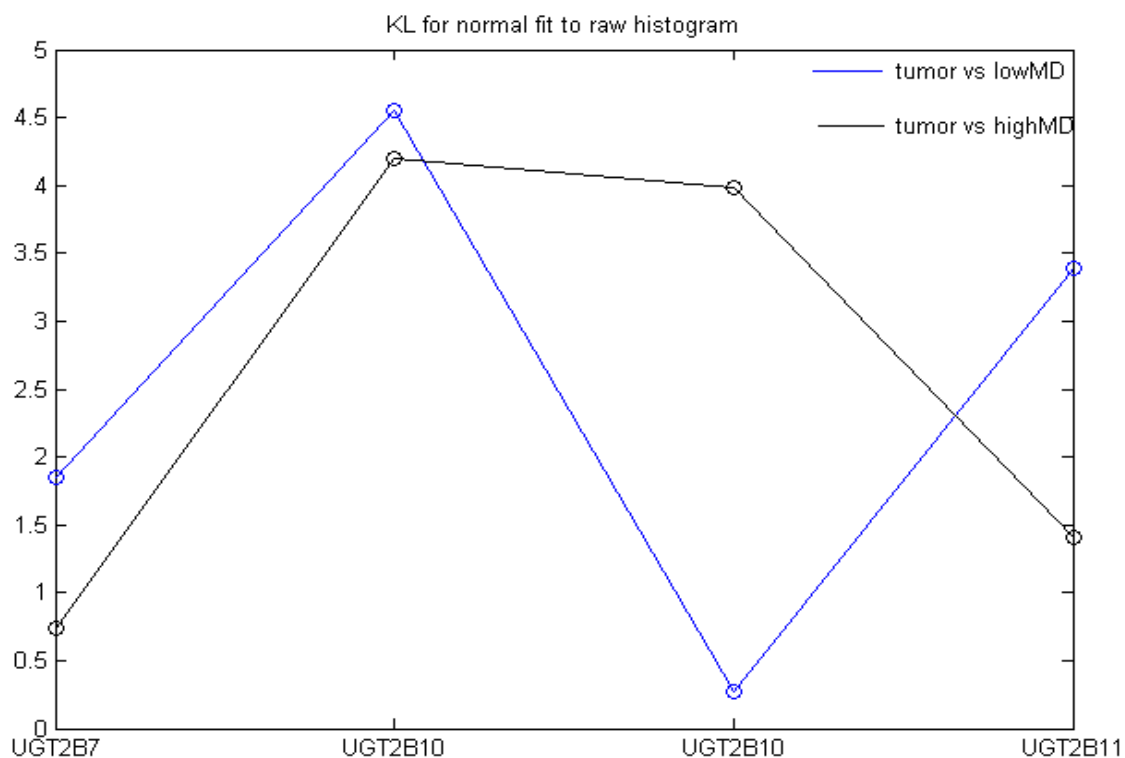

**Table S5:** Gene expression of UGT2B10 in tumour samples (T) and normal adjacent samples (N) from the same breast in an unpublished dataset. There is no significant difference in mean expression by pair wise t-test.

|         | A_23_P7342<br>UGT2B10 |                    | A_23_P7342<br>UGT2B10 |
|---------|-----------------------|--------------------|-----------------------|
| CM 1N   | 9.75                  | CM 1T              | 7.52                  |
| CM 9N   | 8.62                  | CM 9T              | 8.49                  |
| CM 10N  | 8.77                  | CM 10T             | 7.27                  |
| CM 11N  | 9.26                  | CM 11T             | 6.65                  |
| CM 13N  | 10.32                 | CM 13T             | 7.43                  |
| CM 18N  | 10.69                 | CM 18T             | 8.79                  |
| CM 19N  | 9.12                  | CM 19T             | 9.11                  |
| CM 26N  | 8.78                  | CM 26T             | 7.31                  |
| CM 31N  | 8.00                  | CM 31T             | 8.07                  |
| CM 32N  | 7.73                  | CM 32T             | 7.23                  |
| CM 38N  | 10.96                 | CM 38T             | 7.32                  |
| CM 41N  | 9.07                  | CM 41T             | 11.71                 |
| CM 46N  | 8.74                  | CM 46T             | 11.21                 |
| CM 47N  | 11.08                 | CM 47T             | 8.00                  |
| CM 54N  | 7.80                  | CM 54T             | 13.14                 |
| CM 56N  | 7.92                  | CM 56T             | 17.48                 |
| CMG24N  | 6.66                  | CMG24T             | 13.89                 |
| CMG43N  | 8.24                  | CMG43T             | 10.59                 |
| CM 44N  | 8.89                  | CM 44T             | 7.75                  |
| average | 8.97                  | average            | 9.42                  |
| p-value | 0.60                  | (pair wise t-test) |                       |

**Table S6: Range of MD in the breasts of healthy women**

|        |            |
|--------|------------|
| max    | 77.3133466 |
| min    | 1.28417454 |
| mean   | 28.1668549 |
| median | 23.5504612 |

### ***Supplemental discussion***

Gene expression microarray analyses using tissue adjacent to a breast tumour have previously been done [29, 41]. The expression profile in these normal samples will be influenced by the neighbouring breast tumour [42]. Breast reduction mammoplasties have also been used in analysis of healthy breast tissue [43]. These samples are generally collected from large breasts with a higher than average proportion of fatty tissue which may also skew the analyses to some extent. Our study analysed a population more representative of the population of women at risk for developing breast cancer, since we have studied normal breast tissue from women with no malignant disease and not undergoing breast reduction mammoplasties.
